# Supplementary material for: Chemical Constituents, Antioxidant Potential, and Antimicrobial Efficacy of Pimpinella anisum Extracts against Multidrug-Resistant Bacteria
Source: MDPI journal article supplement (doi:10.3390/microorganisms11041024), 2023-04-14
Supplement: s1 [file s1]

**Table S1. Results of the VITEK2 biochemical testing for *Enterococcus faecalis***

|    |       |   |    |      |   |    |       |   |    |       |   |    |       |   |    |       |   |
|----|-------|---|----|------|---|----|-------|---|----|-------|---|----|-------|---|----|-------|---|
| 2  | APPA  | + | 3  | ADO  | - | 4  | PyrA  | - | 5  | IARL  | - | 7  | dCEL  | - | 9  | BGAL  | + |
| 10 | H2S   | + | 11 | BNAG | - | 12 | AGLTP | - | 13 | dGLU  | + | 14 | GGT   | - | 15 | OFF   | + |
| 17 | BGLU  | - | 18 | dMAL | + | 19 | dMNE  | - | 20 | dMNE  | + | 21 | BXYL  | - | 22 | BAlaP | - |
| 23 | PrOA  | + | 26 | LIP  | - | 27 | PLE   | - | 29 | TYrA  | + | 31 | URE   | - | 32 | dSOR  | + |
| 33 | SAC   | + | 34 | dTAG | - | 35 | dTRE  | + | 36 | CIT   | - | 37 | MNT   | - | 39 | 5KG   | - |
| 40 | ILATK | + | 41 | AGLU | - | 42 | SUCT  | + | 43 | NAGA  | - | 44 | AGAL  | - | 45 | PHOS  | - |
| 45 | GLyA  | + | 47 | ODC  | + | 48 | LDC   | + | 53 | IHISa | - | 56 | CMT   | + | 57 | BGUR  | - |
| 58 | O129R | + | 59 | GGAA | - | 61 | ImLTa | + | 62 | ELLM  | - | 64 | ILARA | + |    |       |   |

**Results of the VITEK2 biochemical testing for *Staphylococcus aureus***

|    |           |   |    |      |   |    |       |   |    |       |   |    |       |   |    |       |        |
|----|-----------|---|----|------|---|----|-------|---|----|-------|---|----|-------|---|----|-------|--------|
| 2  | APPA      | - | 3  | ADO  | - | 4  | PyrA  | - | 5  | IARL  | - | 7  | dCEL  | - | 9  | BGAL  | +      |
| 10 | H2S       | + | 11 | BNAG | - | 12 | AGLTP | - | 13 | dGLU  | + | 14 | GGT   | - | 15 | OFF   | +      |
| 17 | BGLU      | + | 18 | dMAL | + | 19 | dMNE  | + | 20 | dMNE  | + | 21 | BXYL  | - | 22 | BAlaP | -      |
| 23 | PrOA      | - | 26 | LIP  | - | 27 | PLE   | - | 29 | TYrA  | + | 31 | URE   | - | 32 | dSOR  | +      |
| 33 | SAC       | + | 34 | dTAG | - | 35 | dTRE  | + | 36 | CIT   | - | 37 | MNT   | - | 39 | 5KG   | +      |
| 40 | ILAT<br>K | + | 41 | AGLU | + | 42 | SUCT  | + | 43 | NAGA  | - | 44 | AGAL  | + | 45 | PHOS  | -      |
| 45 | GLyA      | - | 47 | ODC  | + | 48 | LDC   | + | 53 | IHISa | - | 56 | CMT   | + | 57 | BGUR  | -<br>) |
| 58 | O129R     | + | 59 | GGAA | - | 61 | ImLTa | - | 62 | ELLM  | + | 64 | ILARA | - |    |       |        |

### Results of the VITEK2 biochemical testing for *Salmonella typhi*

|    |       |   |    |      |   |    |       |   |    |       |   |    |       |   |    |       |   |
|----|-------|---|----|------|---|----|-------|---|----|-------|---|----|-------|---|----|-------|---|
| 2  | APPA  | + | 3  | ADO  | - | 4  | PyrA  | - | 5  | IARL  | - | 7  | dCEL  | - | 9  | BGAL  | + |
| 10 | H2S   | - | 11 | BNAG | - | 12 | AGLTP | - | 13 | dGLU  | + | 14 | GGT   | - | 15 | OFF   | + |
| 17 | BGLU  | + | 18 | dMAL | + | 19 | dMNE  | + | 20 | dMNE  | + | 21 | BXYL  | - | 22 | BAlaP | - |
| 23 | PrOA  | - | 26 | LIP  | - | 27 | PLE   | + | 29 | TYrA  | + | 31 | URE   | - | 32 | dSOR  | + |
| 33 | SAC   | + | 34 | dTAG | - | 35 | dTRE  | + | 36 | CIT   | - | 37 | MNT   | - | 39 | 5KG   | - |
| 40 | ILATK | + | 41 | AGLU | - | 42 | SUCT  | + | 43 | NAGA  | - | 44 | AGAL  | + | 45 | PHOS  | - |
| 45 | GLyA  | - | 47 | ODC  | + | 48 | LDC   | + | 53 | IHISa | - | 56 | CMT   | + | 57 | BGUR  | - |
| 58 | O129R | + | 59 | GGAA | - | 61 | ImLTa | - | 62 | ELLM  | + | 64 | ILARA | + |    |       |   |

### Results of the VITEK2 biochemical testing for *Pseudomonas aeruginosa*

|    |       |   |    |      |   |    |       |   |    |       |   |    |       |   |    |       |   |
|----|-------|---|----|------|---|----|-------|---|----|-------|---|----|-------|---|----|-------|---|
| 2  | APPA  | - | 3  | ADO  | - | 4  | PyrA  | - | 5  | IARL  | - | 7  | dCEL  | - | 9  | BGAL  | + |
| 10 | H2S   | - | 11 | BNAG | - | 12 | AGLTP | - | 13 | dGLU  | + | 14 | GGT   | - | 15 | OFF   | + |
| 17 | BGLU  | - | 18 | dMAL | + | 19 | dMNE  | + | 20 | dMNE  | + | 21 | BXYL  | + | 22 | BAlaP | - |
| 23 | PrOA  | + | 26 | LIP  | - | 27 | PLE   | - | 29 | TYrA  | + | 31 | URE   | - | 32 | dSOR  | + |
| 33 | SAC   | - | 34 | dTAG | - | 35 | dTRE  | + | 36 | CIT   | - | 37 | MNT   | - | 39 | 5KG   | - |
| 40 | ILATK | + | 41 | AGLU | - | 42 | SUCT  | + | 43 | NAGA  | - | 44 | AGAL  | + | 45 | PHOS  | - |
| 45 | GLyA  | - | 47 | ODC  | + | 48 | LDC   | + | 53 | IHISa | - | 56 | CMT   | + | 57 | BGUR  | + |
| 58 | O129R | + | 59 | GGAA | - | 61 | ImLTa | - | 62 | ELLM  | + | 64 | ILARA | - |    |       |   |

## Results of the VITEK2 biochemical testing for *Acinetobacter baumannii*

|    |       |   |    |      |   |    |       |   |    |       |   |    |       |   |    |       |   |
|----|-------|---|----|------|---|----|-------|---|----|-------|---|----|-------|---|----|-------|---|
| 2  | APPA  | - | 3  | ADO  | - | 4  | PyrA  | - | 5  | IARL  | - | 7  | dCEL  | - | 9  | BGAL  | + |
| 10 | H2S   | + | 11 | BNAG | - | 12 | AGLTP | - | 13 | dGLU  | + | 14 | GGT   | - | 15 | OFF   | + |
| 17 | BGLU  | + | 18 | dMAL | + | 19 | dMNE  | + | 20 | dMNE  | + | 21 | BXYL  | + | 22 | BAlaP | - |
| 23 | PrOA  | + | 26 | LIP  | - | 27 | PLE   | - | 29 | TYrA  | + | 31 | URE   | - | 32 | dSOR  | + |
| 33 | SAC   | + | 34 | dTAG | - | 35 | dTRE  | + | 36 | CIT   | - | 37 | MNT   | - | 39 | 5KG   | - |
| 40 | ILATK | + | 41 | AGLU | - | 42 | SUCT  | + | 43 | NAGA  | - | 44 | AGAL  | + | 45 | PHOS  | - |
| 45 | GLyA  | - | 47 | ODC  | + | 48 | LDC   | + | 53 | IHISa | - | 56 | CMT   | + | 57 | BGUR  | - |
| 58 | O129R | + | 59 | GGAA | - | 61 | ImLTa | + | 62 | ELLM  | + | 64 | ILARA | - |    |       |   |
